# Supplementary material
Source: PubMed Central journal article supplement (PMC3898627)
Supplement: NIHMS532649-supplement-Appendix.pdf [file NIHMS532649-supplement-Appendix.pdf]

Appendix A: Articles Discussing Belmont Principles in Table 1

| <b>Table 1 Literature Themes</b> | <b>Empirical Sources</b>                                                                                                                                                                                                                                                                                                                                                                                                                                                                                                                                                                     | <b>Citations<br/>(N)</b> |
|----------------------------------|----------------------------------------------------------------------------------------------------------------------------------------------------------------------------------------------------------------------------------------------------------------------------------------------------------------------------------------------------------------------------------------------------------------------------------------------------------------------------------------------------------------------------------------------------------------------------------------------|--------------------------|
| Community Autonomy               | Bastida et al. 2010; Blumenthal 2006; Brody et al. 2007; Brown et al. 2010; Brugge & Missaghian 2006; Buchanan 2007; Chen et al. 2006; Cordner et al. 2012; Ellis et al. 2007; Flicker 2012; Foster et al. 1998; Gibert 2006; Glass & Kaufert 2007; Harding et al. 2012; Jacklin & Kinoshameg 2008; Khanlou 2005; Macaulay et al. 1998; Maiter et al. 2008; Malone et al. 2006; Marshall & Rotimi 2011; Minkler et al. 2002; Minkler 2004; Mohammed 2012; Santos 2008; Schell & Tarbell 1998; Shore, Drew et al. 2011; Smith et al. 2002; Whittle et al. 2010; Wing 2002; Wright et al. 2002 | 30                       |
| Social and Community Justice     | Blumenthal 2006; Brody et al. 2007; Brown et al. 2010; Buchanan et al. 2007; Chen et al. 2006; Flicker & Worthington 2012; Gilbert 2006; Glass & Kaufert 2007; Holkup et al. 2004; Khanlou & Peter 2005; Michener et al. 2012; Minkler et al. 2002; Mitchell & Baker 2005; Ramsey et al. 2011; Santos 2008; Schell & Tarbell 1998; Shore, Brazauskas et al. 2011; Story et al. 2010                                                                                                                                                                                                          | 18                       |
| Community Beneficence            | Blumenthal 2006; Brody et al. 2007; Brown et al. 2010; Brugge & Missaghian 2006; Buchanan 2007; Chen et al. 2006; Deeds et al. 2008; Ellis et al. 2007; Gilbert 2006; Hyatt 2009; Khanlou & Peter 2005; Mitchell & Baker 2005; Ramsey et al. 2011; Santos 2008; Story et al. 2010; Whittle et al. 2010; Wing 2002                                                                                                                                                                                                                                                                            | 17                       |

Appendix B: Articles Discussing Components of Ethical CBPR in Table 2

| <b>Table 2 Literature Themes</b> | <b>Empirical Sources</b>                                                                                                                                                                                                                                                                                                                                                                                                                                                                                                                                                                                                                                                                                                                                                                                                                                                                                                                                                                                                                                                                                                                        | <b>Citations (N)</b> |
|----------------------------------|-------------------------------------------------------------------------------------------------------------------------------------------------------------------------------------------------------------------------------------------------------------------------------------------------------------------------------------------------------------------------------------------------------------------------------------------------------------------------------------------------------------------------------------------------------------------------------------------------------------------------------------------------------------------------------------------------------------------------------------------------------------------------------------------------------------------------------------------------------------------------------------------------------------------------------------------------------------------------------------------------------------------------------------------------------------------------------------------------------------------------------------------------|----------------------|
| Community Collaboration          | Bastida et al. 2010; Blumenthal 2006; Boyer et al. 2007; Brody et al. 2007; Brown et al. 2010; Brugge & Cole 2003; Brugge & Missaghian 2006; Buchanan 2007; Chen et al. 2006; Cordner et al. 2012; Deeds et al. 2008; Ellis et al. 2007; Flicker & Guta 2008; Flicker et al. 2007; Flicker & Worthington 2012; Foster et al. 1998; Frazier et al. 2008; Giese-Davis 2008; Gilbert et al. 2006; Glass & Kaufert 2007; Ham et al. 2004; Harding et al. 2012; Holkup et al. 2004; Hyatt et al. 2009; Jacking & Kinoshameg 2008; Khanlou & Peter 2005; Macaulay et al. 1998; Maiter et al. 2008; Malone et al. 2006; Marshall & Rotimi 2001; Michener et al. 2012; Minker 2004; Minkler et al. 2002; Mitchell & Baker 2005; Mohammed et al. 2012; Poland et al. 2002; Ramsey et al. 2010; Salmon et al. 2010; Sampselle 2007; Santos 2008; Schell & Tarbell 1998; Shannon et al. 2007; Sharp & Foster 2002; Shore, Brazauskas et al. 2011; Shore, Drew et al. 2011; Silka et al. 2008; Smith et al. 2002; Smith et al. 2008; Story et al. 2010; Whittle et al. 2010; Williams et al. 2006; Williamson & Prosser 2002; Wing 2002; Wright et al. 2006 | 54                   |
| Community Significance           | Bastida et al. 2010; Blumenthal 2006; Boyer et al. 2007; Brody et al. 2007; Brown et al. 2010; Brugge & Cole 2003; Brugge & Missaghian 2006; Buchanan et al. 2007; Chen et al. 2006; Cordner et al. 2012; Deeds et al. 2008; Ellis et al. 2007; Flicker & Guta 2008; Flicker et al. 2007; Flicker & Worthington 2012; Foster et al. 1998; Giese-Davis 2008; Glass & Kaufert 2007; Ham et al. 2004; Harding et al. 2012; Hyatt et al. 2009; Jacklin & Kinoshameg 2008; Khanlou & Peter 2005; Macaulay et al. 1998; Maiter 2008; Malone et al. 2006; Marshall & Rotimi 2001; Minkler 2004; Minkler et al.                                                                                                                                                                                                                                                                                                                                                                                                                                                                                                                                         | 44                   |

|                   |                                                                                                                                                                                                                                                                                                                                                                                                                                                                                                                                                                                                                                                                                                                                                                       |    |
|-------------------|-----------------------------------------------------------------------------------------------------------------------------------------------------------------------------------------------------------------------------------------------------------------------------------------------------------------------------------------------------------------------------------------------------------------------------------------------------------------------------------------------------------------------------------------------------------------------------------------------------------------------------------------------------------------------------------------------------------------------------------------------------------------------|----|
|                   | 2002; Mitchell & Baker 2005; Mohammed et al. 2012; Ramsey et al. 2011; Sampsellet et al. 2006; Santos 2008; Schell & Tarbell 1998; Shannon et al. 2007; Sharp & Foster 2002; Shore, Brazauskas et al. 2011; Shore, Drew et al. 2011; Silka et al. 2006; Smith et al. 2002; Smith et al. 2008; Story et al. 2010; Wright et al. 2006                                                                                                                                                                                                                                                                                                                                                                                                                                   |    |
| Community Return  | Bastida et al. 2010; Blumenthal 2006; Brody et al. 2007; Brown et al. 2010; Brugge & Cole 2003; Buchanan et al. 2007; Chen et al. 2006; Cordner et al. 2012; Ellis et al. 2007; Flicker et al. 2007; Flicker & Guta 2008; Flicker & Worthington 2012; Frazier et al. 2008; Gilbert et al. 2006; Glass & Kaufert 2007; Harding et al. 2012; Holkup et al. 2004; Jacklin & Kinoshameg 2008; Khanlou & Peter 2005; Macaulay et al. 1998; Malone et al. 2006; Michener et al. 2012; Minkler 2004; Minkler et al. 2002; Mitchell & Baker 2005; Ramsey et al. 2011; Salmon et al. 2010; Sampsellet et al. 2006; Schell & Tarbell 1998; Shannon et al. 2007; Shore, Brazauskas et al. 2011; Shore, Drew et al. 2011; Silka et al. 2006; Smith et al. 2002; Story et al. 2010 | 35 |
| Community Control | Bastida et al. 2010; Blumenthal 2006; Boyer et al. 2007; Brody et al. 2007; Brown et al. 2010; Ellis et al. 2007; Flicker et al. 2007; Flicker & Worthington 2012; Foster et al. 1998; Gilbert et al. 2006; Harding et al. 2012; Macaulay et al. 1998; Malone et al. 2006; Minkler et al. 2002; Mitchell & Baker 2005; Mohammed et al. 2012; Poland et al. 2002; Salmon et al. 2010; Sampsellet et al. 2006; Schell & Tarbell 1998; Shannon et al. 2007; Smith et al. 2002; Williamson & Prosser 2002                                                                                                                                                                                                                                                                 | 23 |

Appendix C: Articles Discussing Ethical Challenges of CBPR in Table 3

| <b>Table 3 Literature Themes</b> | <b>Empirical Sources</b>                                                                                                                                                                                                                                                                                                                                                                                                                                                           | <b>Citations (N)</b> |
|----------------------------------|------------------------------------------------------------------------------------------------------------------------------------------------------------------------------------------------------------------------------------------------------------------------------------------------------------------------------------------------------------------------------------------------------------------------------------------------------------------------------------|----------------------|
| Insider-outsider tensions        | Bastida et al. 2010; Blumenthal 2006; Brugge & Cole 2003; Flicker & Worthington 2012; Giese-Davis 2008; Gilbert 2006; Glass & Kaufert 2007; Harding et al. 2012; Jacklin & Kinoshameg 2008; Marshall & Rotimi 2001; Michener et al. 2012; Minkler, 2004; Minkler, Fadem et al. 2002; Mohammed et al. 2012; Poland et al. 2002; Salmon et al., 2010; Sampsel, 2006; Santos, 2008; Shannon 2007; Silka et al. 2006; Story et al. 2010; Whittle et al. 2010; Williams 2006; Wing 2002 | 24                   |
| Protecting communities           | Blumenthal 2006; Brown et al. 2010; Brugge & Missaghian 2006; Buchanan 2007; Deeds et al. 2008; Flicker et al. 2007; Flicker & Worthington 2012; Foster et al. 1998; Glass & Kaufert 2007; Holkup et al 2004; Hyatt et al. 2009; Jacklin & Kinoshameg 2008; Khanlou & Peter 2005; Malone et al. 2006; Mitchell & Baker 2005; Santos 2008; Shannon 2007; Sharp & Foster 2002; Smith et al. 2008; Whittle et al. 2010; Williamson & Prosser 2002; Wing 2002                          | 22                   |
| Community representation         | Buchanan 2007; Chen et al. 2006; Cordner et al. 2012; Flicker et al. 2007; Flicker & Worthington 2012; Gilbert 2006; Glass & Kaufert 2007; Maiter et al. 2008; Marshall & Rotimi 2001; Minkler Fadem et al. 2002; Mohammed et al. 2012; Shannon 2007; Smith et al. 2008; Story et al. 2010; Wolf 2010                                                                                                                                                                              | 15                   |
| Data sharing, reporting results  | Boyer et al. 2007; Brody et al. 2007; Brugge & Cole 2003; Flicker et al. 2007; Glass & Kaufert 2007; Guta et al. 2012; Harding et al., 2012; Holkup et al 2004; Minkler 2004; Minkler et al. 2002; Mitchell & Baker 2005; Wing 2002                                                                                                                                                                                                                                                | 12                   |
| Working with IRBs                | Brown et al. 2010; Cordner et al. 2012; Deeds et al. 2008; Glass & Kaufert 2007; Harding et al. 2012; Khanlou & Peter 2005; Malone et al. 2006; Sharp & Foster 2002;                                                                                                                                                                                                                                                                                                               | 12                   |

|                                               |                                                                                                                                                        |   |
|-----------------------------------------------|--------------------------------------------------------------------------------------------------------------------------------------------------------|---|
|                                               | Shore, Brazauskas et al. 2011; Shore, Drew et al. 2011; Wing 2002; Wolf 2010                                                                           |   |
| Managing dual roles                           | Bastida et al. 2010; Jacklin & Kinoshameg 2008; Smith et al. 2008; Whittle et al. 2010; Williams et al. 2006; Wing 2002; Wolf 2010; Wright et al. 2006 | 8 |
| Practicalities                                | Jacklin & Kinoshameg 2008; Minkler 2004; Poland 2002; Ramsey et al. 2011; Shore, Brazauskas et al. 2011; Smith et al. 2002                             | 6 |
| Challenges of community commitment            | Giese-Davis 2008; Mitchell & Baker 2005; Ramsey et al. 2011; Salmon et al. 2010; Smith et al. 2002                                                     | 5 |
| Cyclical, dynamic nature of CBPR              | Glass & Kaufert 2007; Guta et al. 2012; Khanlou & Peter 2005; Silka et al. 2006; Williamson & Prosser 2002                                             | 5 |
| Lack of explicit guidelines                   | Flicker & Guta 2008; Mitchell & Baker 2005; Ramsey et al. 2011                                                                                         | 3 |
| Ethics is assumed                             | Cordner et al. 2012; Ellis et al. 2007; Guta et al. 2012                                                                                               | 3 |
| Misconduct occurs under ethical guise of CBPR | Bastida et al., 2010; Mitchell & Baker 2005                                                                                                            | 2 |
| Resources and funding                         | Buchanan 2007; Sampsel 2006                                                                                                                            | 2 |

Appendix D: Articles Discussing Ways to Ensure CBPR in Table 4

| Table 4 Literature Themes             | Empirical Sources                                                                                                                                                                                                                                                                                                                                                                                                                                                                                                                                                                            | Citations (N) |
|---------------------------------------|----------------------------------------------------------------------------------------------------------------------------------------------------------------------------------------------------------------------------------------------------------------------------------------------------------------------------------------------------------------------------------------------------------------------------------------------------------------------------------------------------------------------------------------------------------------------------------------------|---------------|
| Effectively/actively engage community | Bastida et al. 2010; Boyer et al. 2007; Brown et al. 2010; Brugge & Cole 2003; Brugge & Missaghian 2006; Chen et al. 2006; Cordner et al. 2012; Foster et al. 1998; Glass & Kaufert 2007; Ham et al 2004; Holkup et al. 2004; Hyatt et al. 2009; Jacklin & Kinoshameg 2008; Maiter et al. 2008; Malone et al. 2006; Marhsall & Rotimi 2011; Michener et al. 2012; Mohammed et al. 2012; Poland 2002; Ramsey 2011; Salmon et al. 2006; Santos 2008; Schell 1998; Shannon 2007; Sharp & Foster 2002; Silka et al. 2006; Smith et al. 2002; Smith et al. 2008; Story et al. 2010; Williams 2006 | 30            |
| Prioritize transparency               | Basitda 2010; Blumenthal 2006; Brody et al. 2007; Brown et al. 2010; Chen et al. 2006; Deeds et al. 2008; Flicker & Guta 2008; Flicker & Worthington 2012; Frazier 2008; Giese-Davis 2008; Ham et al. 2004; Harding et al. 2012; Holkup et al. 2004; Hyatt et al. 2009; Jacklin & Kinoshameg 2008; Khanlou & Peter 2005; Macaulay et al. 1998; Maiter et al. 2008; Minker et al. 2002; Minkler 2004; Mitchell & Baker 2005; Mohammed et al. 2012; Poland 2002; Salmon et al. 2010; Schell 1998; Silka et al. 2006; Smith et al. 2002; Smith et al. 2008; Wolf 2010                           | 29            |
| Develop CABs                          | Bastida et al. 2010; Blumenthal 2006; Brody et al. 2007; Buchanan 2007; Chen et al. 2006; Deeds et al. 2008; Flicker & Guta 2008; Foster et al. 1998; Ellis et al. 2007; Glass & Kaufert 2007; Ham et al. 2004; Holkup et al. 2004; Maiter et al. 2008; Marshall & Rotimi 2001; Minker 2004; Minkler et al. 2002; Mohammad et al. 2012; Poland 2002; Ramsey 2011; Sampsel 2006; Shannon 2007; Sharp & Foster, 2002; Whittle et al. 2010                                                                                                                                                      | 23            |
| Educate IRBs about CBPR               | Brown et al. 2010; Buchanan et al. 2007; Deeds et al. 2008; Flicker 2007; Flicker & Worthington 2012; Guta et al. 2012; Ham et al. 2004; Holkup et al. 2004; Hyatt et al. 2009; Sharp & Foster 2002; Shore, Drew et                                                                                                                                                                                                                                                                                                                                                                          | 13            |

|                                    |                                                                                                                                                                                                                               |    |
|------------------------------------|-------------------------------------------------------------------------------------------------------------------------------------------------------------------------------------------------------------------------------|----|
|                                    | al. 2011; Whittle et al. 2010; Wolf 2010                                                                                                                                                                                      |    |
| Develop community review boards    | Brown et al. 2010; Chen et al. 2006; Flicker & Worthington 2012; Foster et al. 1998; Ham et al. 2004; Guta et al. 2012; Khanlou & Peter 2005; Santos 2008; Shore, Brazauskas 2011; Shore, Drew et al. 2011; Story et al. 2010 | 11 |
| Promote professional development   | Bastida et al. 2010; Chen et al. 2006; Cordner et al. 2012; Minkler 2004; Mohammed et al. 2012; Sampsel 2006; Smith et al. 2008; Williamson & Prosser 2002; Wing 2002                                                         | 9  |
| Carefully consider study personnel | Bastida et al. 2010; Chen et al. 2006; Harding et al. 2012; Whittle et al. 2010                                                                                                                                               | 4  |
| Change funding priorities          | Buchanan et al. 2007; Frazier 2008; Giese-Davis 2008; Minkler 2004                                                                                                                                                            | 4  |
| Maintain rigorous research design  | Giese-Davis 2008; Holkup et al. 2004; Poland 2002; Wing 2002                                                                                                                                                                  | 4  |
